# Supplementary material for: Effect of a Water Treatment and Hygiene Intervention on Household Drinking Water Quality and Diarrhoea: A Sub-study of the TISA Trial in Senegal
Source: Research Square preprint supplement (doi:10.21203/rs.3.rs-7506201/v1), 2025-10-15
Supplement: Supplementary file 1 [file d3267009ece804abd5a042dd.docx]

**Supplementary Information**


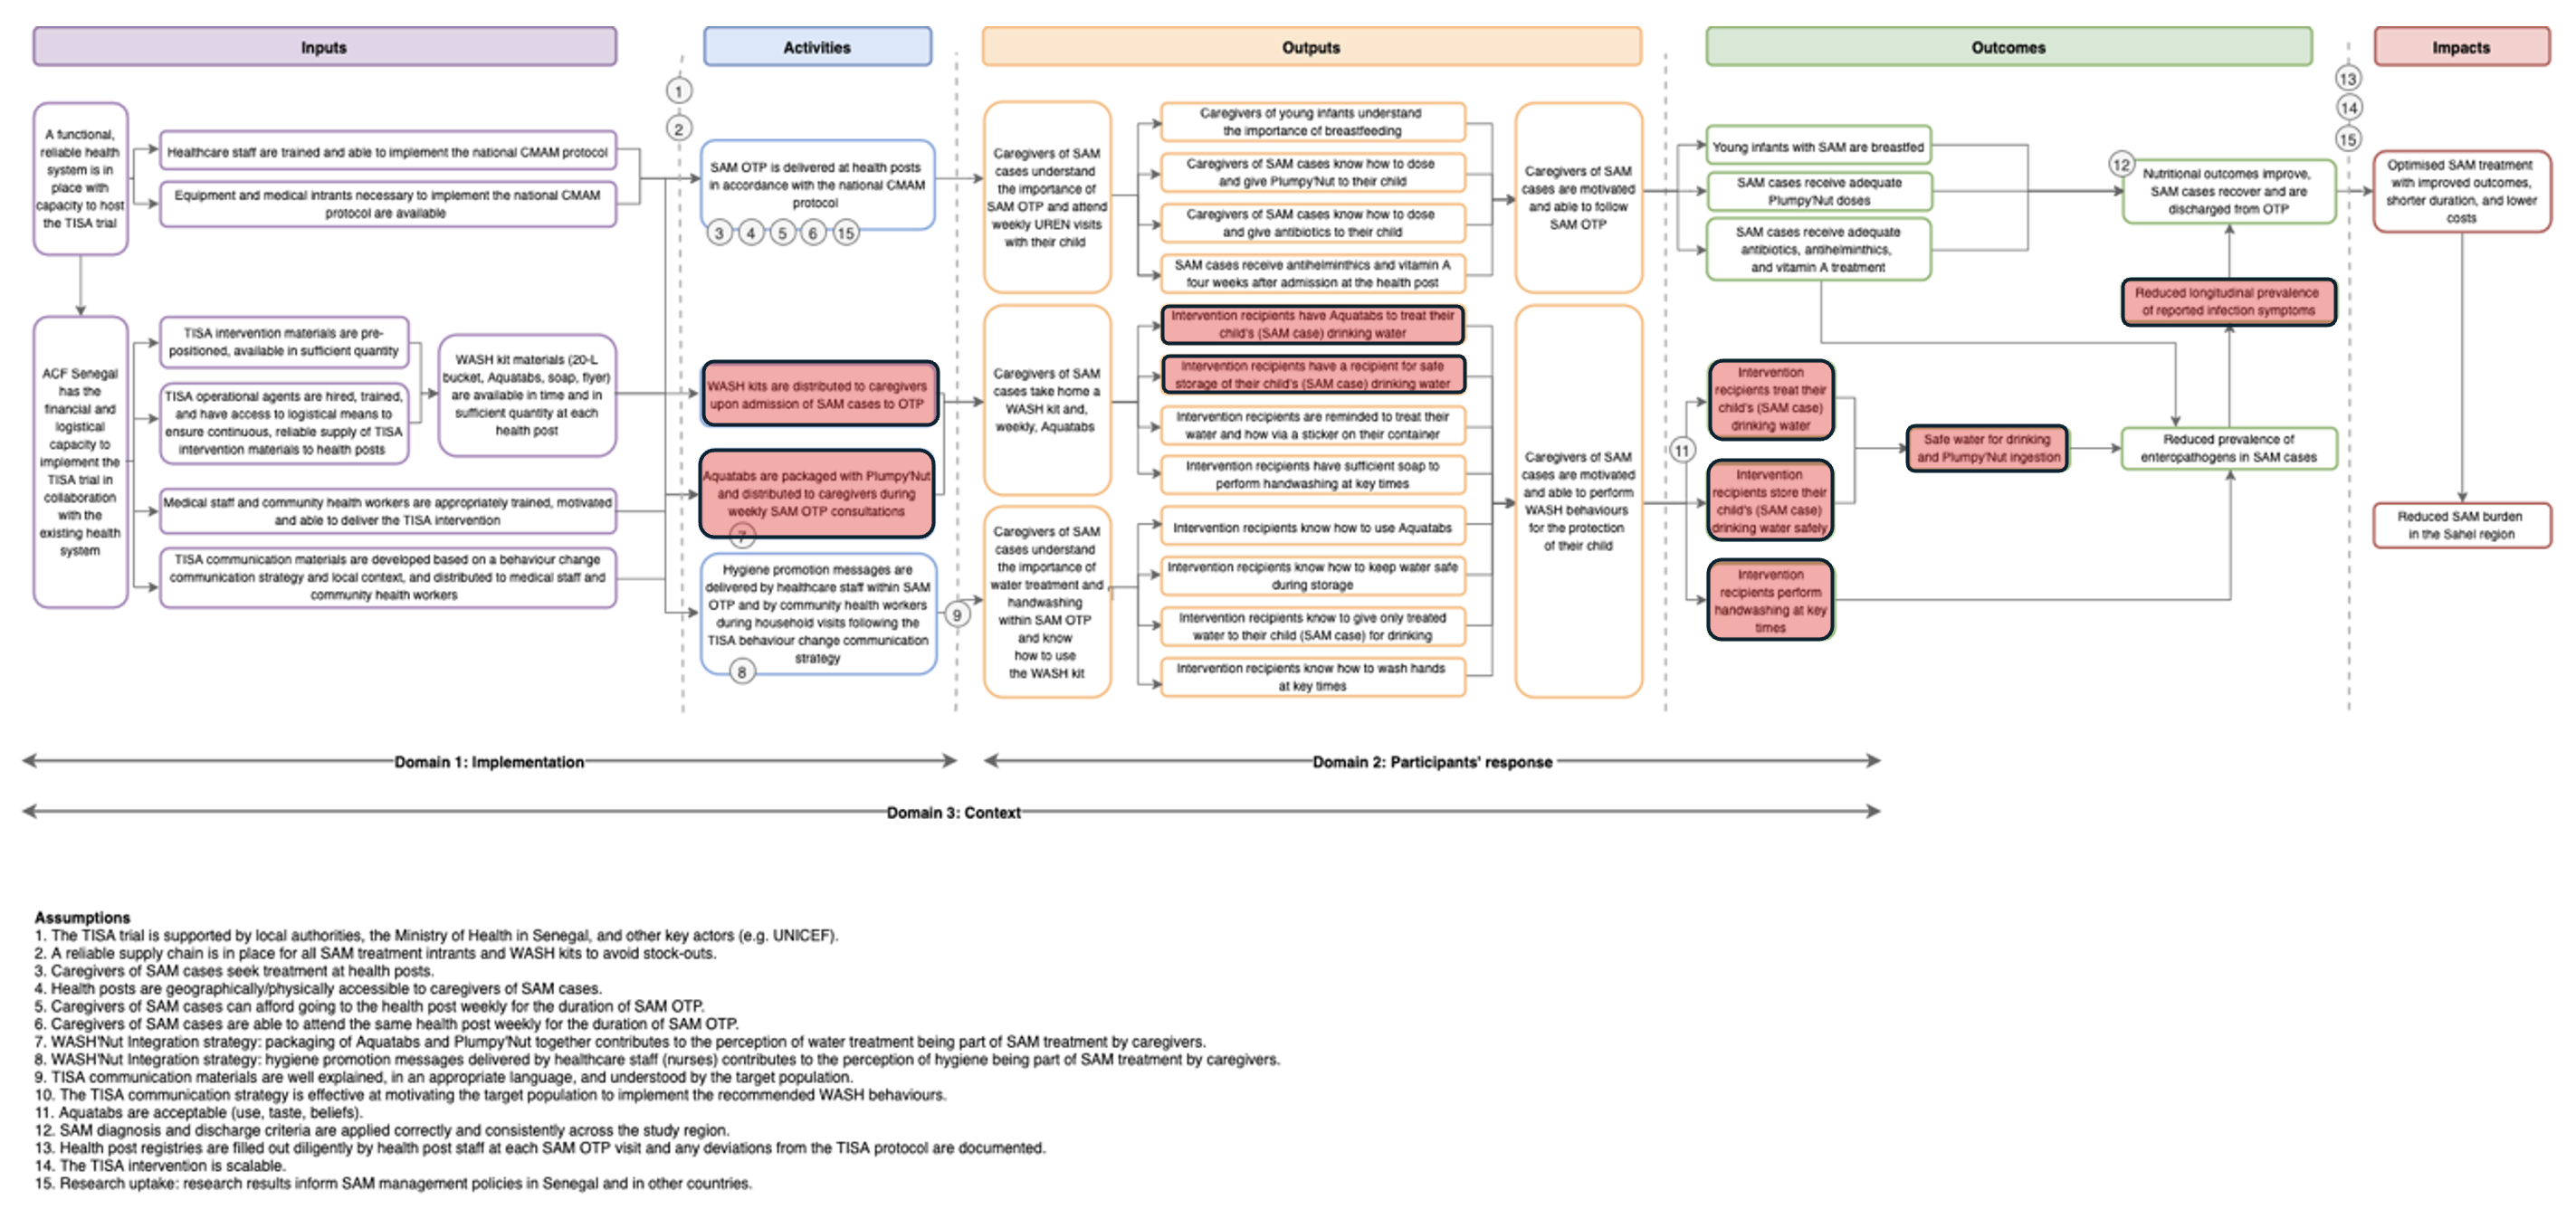


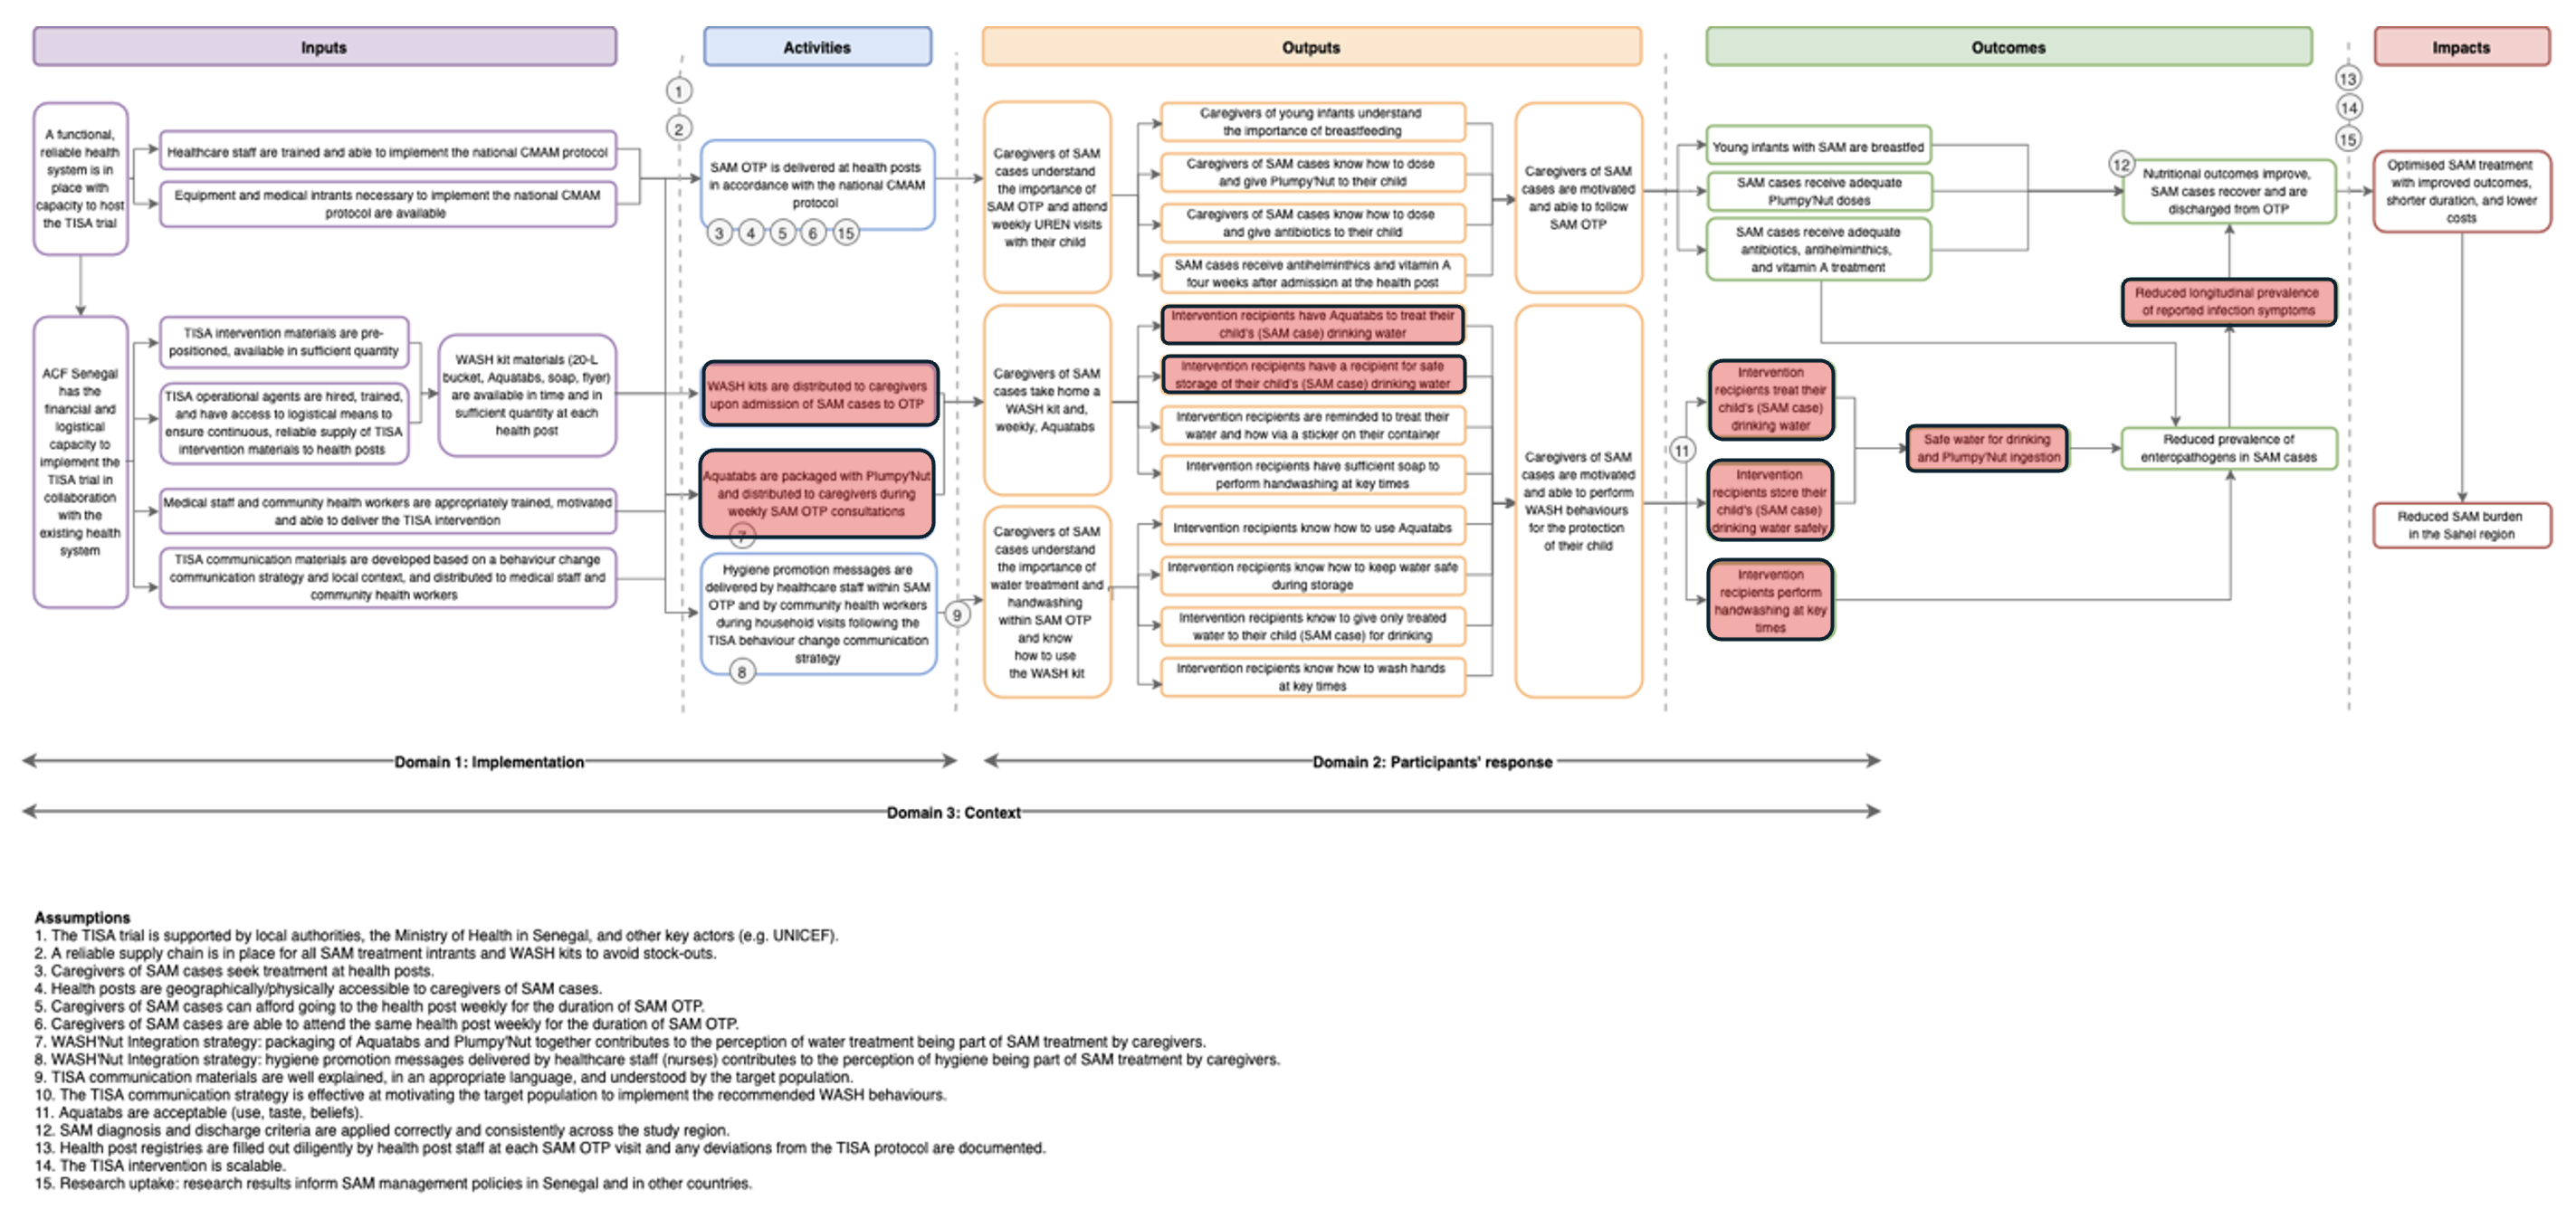


Supplementary figure 1: Theory of change of the TISA trial, highlighting in red the components presented in this sub-study

**
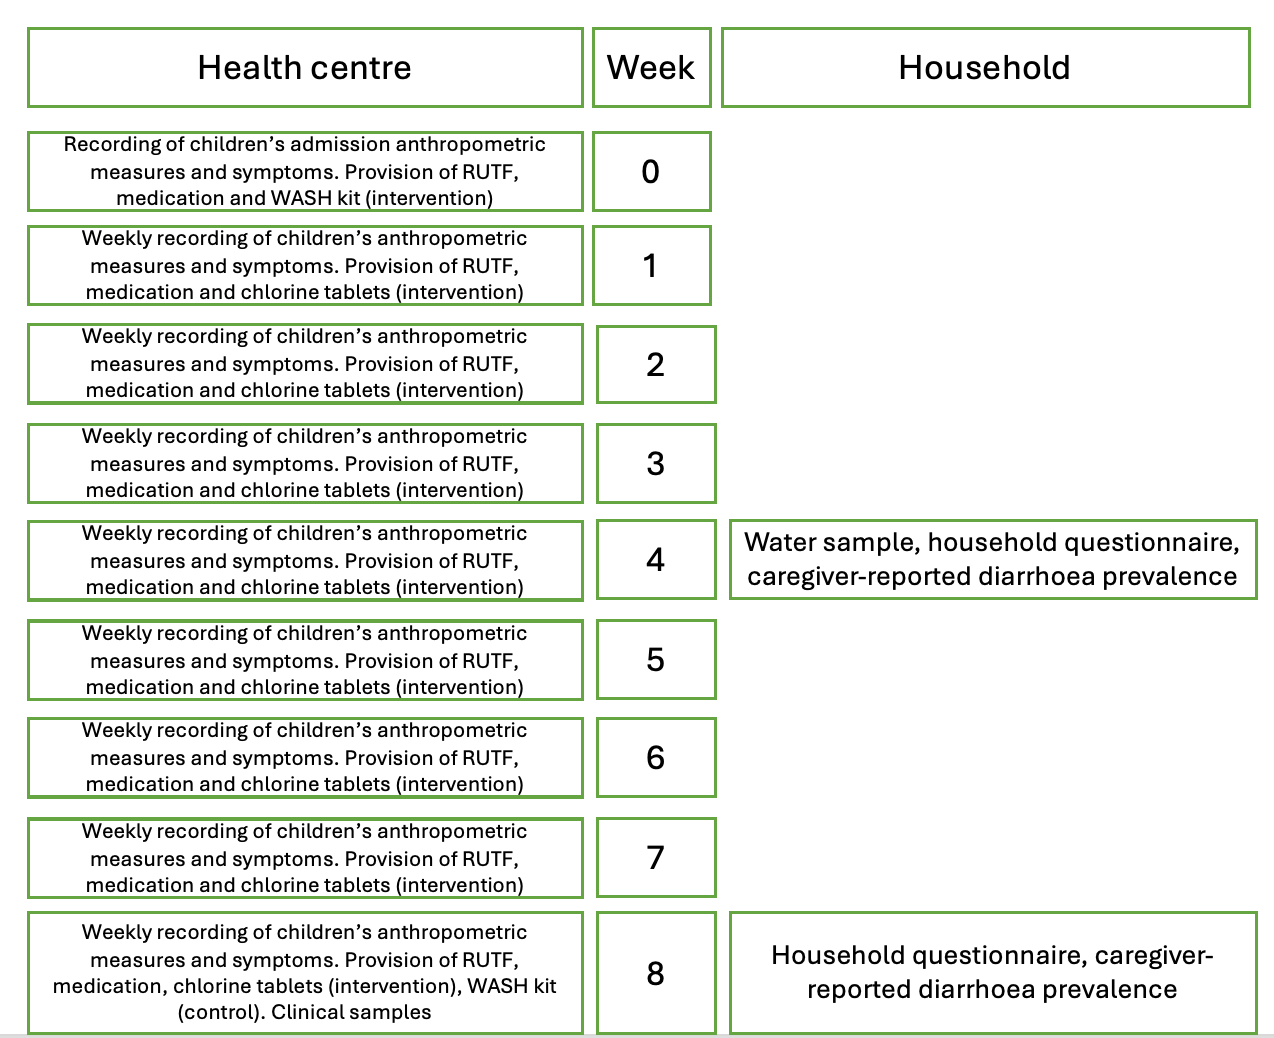
**

Supplementary figure 2: Enrolment and follow-up schedule. RUTF = ready-to-use therapeutic food

**
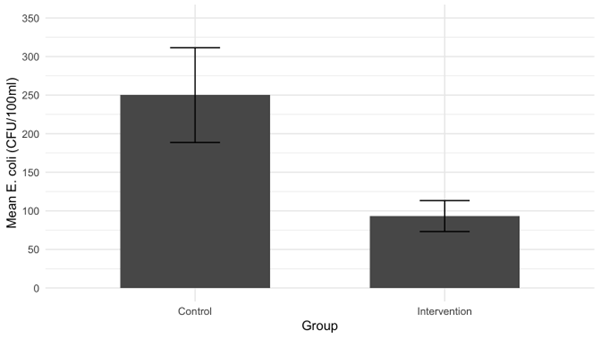
**

**
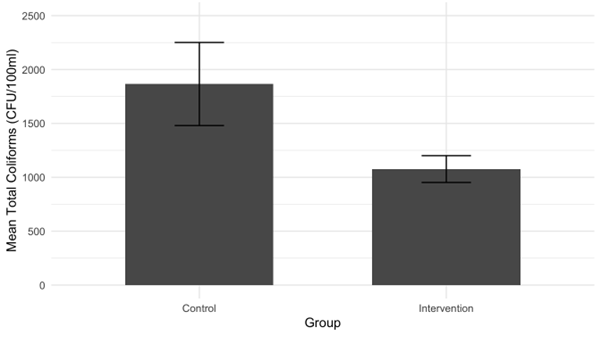
**

Supplementary figure 3: Mean E. coli (top) and total coliform (bottom) concentration (CFU/100 mL) in household drinking water samples. Error bars represent standard error.

Supplementary table 1: Summary of chlorine residual concentrations (mg/L) by time since water treatment among households using chlorine to treat water. Chlorine residuals tend to decrease with increasing time since treatment.

| Time since treating water with chlorine | n | Median chlorine residual (mg/L) | Interquartile range (mg/L) |
| --- | --- | --- | --- |
| 1 hour | 13 | 1 | 1.5 |
| 12 hours | 132 | 1 | 1.75 |
| 24 hours | 25 | 1.5 | 3.5 |
| 48 hours | 10 | 0.1 | 0 |
| Do not remember | 5 | 0.5 | 0.4 |

Supplementary table 2: Association between microbial water quality, chlorine residual levels, and diarrhoea prevalence. Water sample with chlorine residual ≥0.2 mg/L were significantly more likely to have microbiologically safe drinking water (<1 E. coli CFU/100 ml) compared to those with residuals <0.2 mg/L (aOR = 2.56, 95% CI: 1.43–4.66; p = 0.0016). While lower diarrhoea prevalence was observed among children with microbiologically safe water at week 8, especially when using the <10 CFU/100 ml threshold (13.1% vs. 23.3%, aOR = 0.50, 95% CI: 0.28–0.87; p = 0.014), this association was weaker and not statistically significant when using the <1 CFU/100 mL threshold (aOR = 0.68, 95% CI: 0.41–1.12; p = 0.129). No significant association was found between chlorine residual levels and diarrhoea prevalence at week 8.

| Microbial water quality | | | | | | | | | | | | | | | | | | | | | | |
| --- | --- | --- | --- | --- | --- | --- | --- | --- | --- | --- | --- | --- | --- | --- | --- | --- | --- | --- | --- | --- | --- | --- |
|  | | Chlorine residual <0.2 mg/L | | | Chlorine residual ≥0.2 mg/L | | | | | Crude effect1 | | | | | | | Adjusted effect2 | | | | | |
|  | | n/N | % | | n/N | | % | | | Odds ratio | | | 95% CI | | p-value | | Odds ratio | | 95% CI | | p-value | |
| Safe water (<1 *E. coli* CFU/100 mL) | 75/246 | | 30.0% | | 105/199 | | 52.8% | | | 2.55 | | | 1.44, 4.50 | | 0.0013 | | 2.56 | | 1.43, 4.66 | | 0.0016 | |
| Diarrhoea prevalence | | | | | | | | | | | | | | | | | | | | | | |
|  | | Unsafe water (≥1 *E.coli* CFU/100 mL) | | | | Safe water (<1 *E.coli* CFU/100 mL) | | | | | Crude effect1 | | | | | | Adjusted effect2 | | | | | |
|  | | n/N | | % | | n/N | | % | | | Odds ratio | | 95% CI | | p-value | | Odds ratio | | 95% CI | | p-value | |
| Week 0 | | 99/265 | | 37.4% | | 63/180 | | | 35.0% | | | 1.00 | |  | |  | | 1.00 | |  | |  |
| Week 8 | | 40/209 | | 19.1% | | 20/149 | | | 13.4% | | | 0.66 | | 0.34, 1.08 | | 0.1 | | 0.68 | | 0.41, 1.12 | | 0.129 |
| Diarrhoea prevalence | | | | | | | | | | | | | | | | | | | | | | |
|  | | Unsafe water (≥10 *E.coli* CFU/ 100ml) | | | | Safe water (<10 *E.coli* CFU/ 100ml) | | | | | Crude effect1 | | | | | | Adjusted effect2 | | | | | |
|  | | n/N | | % | | n/N | | % | | | Odds ratio | | 95% CI | | p-value | | Odds ratio | | 95% CI | | p-value | |
| Week 0 | | 69/171 | | 40.4% | | 93/274 | | | 33.9% | | | 1.0 | |  | |  | | 1.00 | |  | |  |
| Week 8 | | 30/129 | | 23.3% | | 30/229 | | | 13.1% | | | 0.5 | | 0.29, 0.85 | | 0.015 | | 0.5 | | 0.28, 0.87 | | 0.014 |
| Diarrhoea prevalence | | | | | | | | | | | | | | | | | | | | | | |
|  | | Chlorine residual <0.2 mg/L | | | | Chlorine residual ≥0.2 mg/L | | | | | Crude effect1 | | | | | | Adjusted effect2 | | | | | |
|  | | n/N | | % | | n/N | | % | | | Odds ratio | | 95% CI | | p-value | | Odds ratio | | 95% CI | | p-value | |
| Week 0 | | 89/246 | | 36.2% | | 73/199 | | | 36.7% | | | 1.00 | |  | |  | | 1.00 | |  | |  |
| Week 8 | | 35/196 | | 17.9% | | 25/162 | | | 15.4% | | | 0.84 | | 0.47, 1.5 | | 0.069 | | 0.81 | | 0.46, 1.46 | | 0.49 |

1 Crude effect based on logistic regression with robust standard errors to account for clustering

2 Adjusted for clustering, age, sex, open defecation, and diarrhoea prevalence at admission

**Questionnaire #1**

Traitement Intégré de la Sous-Nutrition Aiguë (TISA) Study

Administered at UREN immediately after enrolment.

Enumerator ID: ______________

UREN location: _______________

UREN ID: _______________

Date of survey: DD/MM/YYYY

DEMOGRAPHICS

1. Select the respondent’s sex.
2. Male
3. Female

1. In what month and year were you born?

Month: _____________; Year: ______________

1. What is the highest level of school you attended?
2. None *(go to #5)*
3. Primary
4. Secondary
5. Higher
6. Prefer not to answer
7. Don’t know

1. What is the highest grade completed at that school?   _______________

1. How many children do you have, including the child seeking care today?

WASH PRACTICES

1. Where do you usually collect water from for drinking? *(Select one option.)*

1. Community tap
2. Tap at the household
3. Unprotected well
4. Protected well
5. Surface water (river, ponds)
6. Rainwater
7. Other: ____________

1. Do you sometimes collect water for drinking from other sources?
2. Yes
3. No *(go to #9)*
4. Don’t know *(go to #9)*

1. What are the other water sources that you use for drinking? *(Multiple answers possible.)*

1. Community tap
2. Tap at the household
3. Unprotected well
4. Protected well
5. Surface water (river, ponds)
6. Rainwater
7. Other: ____________

1. Do you collect water for other purposes such as laundry from other sources?

1. Yes
2. No *(go to #11)*
3. Don’t know *(go to #11)*

1. What are the water sources that you use for purposes other than drinking? *(Multiple answers possible.)*
2. Community tap
3. Tap at the household
4. Unprotected well
5. Protected well
6. Surface water (river, ponds)
7. Rainwater
8. Other: ____________

1. Do you usually do something with the water that you collect before giving it to your child for drinking?
2. Yes
3. No *(go to #13)*
4. Don’t know *(go to #13)*

1. What do you usually do with the water that you collect before giving it to your child for drinking?
2. Let settle
3. Filter through a cloth
4. Boil
5. Treat with chlorine tablets
6. Treat with liquid chlorine
7. Other: ____________

1. What treatments do you know of that can make water safe to drink?
2. Settling
3. Cloth filtration
4. Boiling
5. Chlorine tablets
6. Liquid chlorine
7. Other: ____________

1. Have you washed your hands within the last day (since this time yesterday)?
2. Yes
3. No *(go to #17)*
4. Don’t know *(go to #17)*

1. What were all of the times when you washed your hands within the last day (since this time yesterday)? (*Do not prompt. After each response, ask “any other times?”*)
2. After defecation
3. After cleaning/wiping the child’s bottom
4. After changing the nappy
5. Before preparing food
6. Before eating
7. Before feeding the child
8. After eating
9. Coming back from work/outside the home
10. Other: _______________________________
11. Cannot remember/does not know

1. What did you use to wash your hands?
2. Water only
3. Soap and water
4. Dirt
5. Ash and water
6. Other: _____________

1. Have you had diarrhea in the past week? Diarrhea means three or more loose stools per day at any point (*show Bristol stool chart and point to Types 6 and 7*).
2. Yes
3. No
4. Don’t know

1. Has your child had diarrhea in the past week?
2. Yes
3. No
4. Don’t know

1. What type of latrine or sanitation system do you use most often?
2. Flush/pour flush toilet to piped sewer system
3. Flush/pour flush toilet to underground pit/tank
4. Pit latrine with concrete slab (not pour flush)
5. Pit latrine without slab (not pour flush)
6. Bucket *(go to #21)*
7. Bag *(go to #21)*
8. Open defecation (no facilities) *(go to #21)*
9. Other: __________________

1. Is this toilet/latrine shared with other households or is it for your private use only?

1. Shared
2. Private
3. Don’t know

1. Where did your child last defecate?
2. Nappy
3. Potty
4. Toilet at household
5. On the ground/in the open
6. Other: __________________
7. Don’t know

1. What was done to dispose of the feces?
2. Put/rinsed into toilet or latrine
3. Put/rinsed into drain or ditch
4. Thrown into garbage
5. Buried
6. Left in the open
7. Other: ______________________
8. Don’t know

**Questionnaire #2 (week 4)**

Traitement Intégré de la Sous-Nutrition Aiguë (TISA) Study

Administered at households during the first follow-up visit.

Enumerator ID: ______________

Location: ___________________

Household ID: _______________

Date of Survey: DD/MM/YYYY

GPS coordinates:

1. Are you the person responsible for taking care of children in this household?
2. Yes *(go to #4)*
3. No

1. May I speak with the person responsible for taking care of children in this household?
2. Yes *(go to #4 and continue with the children’s caregiver)*
3. No

1. When do you expect the person responsible for taking care of children in this household to come back?

1. Are you enrolled in the TISA study with your child?
2. Yes
3. No *(interrupt).*
4. Don’t know *(interrupt)*

HOUSEHOLD CHARACTERISTICS

1. Select floor type. *(Multiple answers possible.)*
2. Dirt
3. Concrete
4. Tiles
5. Other: _______

1. Select wall type. *(Multiple answers possible.)*
2. Dirt
3. Concrete
4. Bricks
5. Wood
6. Plastic/cloth
7. Other: ______

1. Select roof type. *(Multiple answers possible.)*
2. Metallic
3. Straw
4. Wood
5. Plastic/cloth
6. Other: _________

1. Does your household have electricity?
2. Yes
3. No *(go to #10)*

1. What is your source of electricity?
2. Network
3. Generator
4. Solar panels
5. Batteries
6. Other: ________

1. Does your household own cattle?
2. Yes
3. No *(go to #12)*

1. Can you tell me the type and number of animals that you have?
2. Cows: _____
3. Sheep: _____
4. Goats: _____
5. Chicken: _____
6. Horse/mule: _____
7. Other: ____

ADHERENCE TO SAM TREATMENT

1. When is the last time you went to the health post with your child?
2. Within the past 7 days
3. 1-2 weeks ago
4. More than 2 weeks ago

1. Have you received Plumpy’Nut to give to your child in the last two weeks?
2. Yes
3. No
4. Don’t know

1. How many Plumpy’Nut sachets do you currently have at home? ______

1. How many sachets of Plumpy’Nut do you give to your child daily? _____________

1. Do you do anything with the Plumpy’Nut sachet before giving them to your child?

1. Nothing
2. Wash them
3. Mix with other food
4. Other: ______

WASH

1. Can you please show me where you keep the water that you give your child for drinking? *(Observe and select container type, only one.)*
2. Clay pot
3. Jerrycan
4. Plastic bucket
5. Large barrel
6. Buried clay reservoir
7. Plastic bottles
8. Doesn’t know / not showing / no water *(go to #33)*
9. Other: __________

1. *Observe and select all that apply: the container is…*
2. Covered
3. With a tap
4. Empty

1. *Observe and estimate container volume:* ________

For the intervention group only:

24a. *Observe: is this the container that was provided to TISA participants?*

1. Yes
2. No
3. Unclear

1. Where does the water in this container come from? *(Point at the container identified in #21.)*
2. Community tap
3. Tap at the household
4. Unprotected well
5. Protected well
6. Surface water (river, ponds)
7. Rainwater
8. Other: ____________

1. When is the last time that you refilled this container?
2. Less than 1 hour ago
3. 1-12 hours ago
4. 12-24 hours ago
5. 24-48 hours ago
6. More than 48 hours ago

1. Did you treat the water in this container after collection?
2. Yes
3. No *(go to #27)*
4. Don’t know *(go to #27)*

1. Can you please show me what you used to treat the water in this container? *(Select all that apply.)*
2. Settling
3. Cloth filtration
4. Chlorine tablets
5. Liquid chlorine
6. Other: ____________

For the intervention group only:

28a. *Observe: are these the chlorine tablets that were distributed to TISA participants?*

1. Yes
2. No *(go to #28c)*
3. Unclear *(go to #28c)*

28b. Can you show me how many chlorine tablets you currently have at home?

*Estimate number:*_________  *(Go to #29.)*

28c. Did you receive chlorine tablets at the UREN?

1. Yes
2. No *(go to #29)*
3. Unclear *(go to #29)*

28d. Why are you not using the chlorine tablets that you received?

1. No time
2. Bad taste
3. Forgot
4. No tablets left
5. Other: ________

1. May I have a cup of water from this container?
2. Yes
3. No / refuse *(go to #33)*

1. Measure turbidity (NTU): _______

1. Measure free chlorine residual (mg/L): ______

1. Measure total chlorine (mg/L): ______

1. Do you sometimes collect water for drinking from other sources than the one where you collected the water from this container? *(Point at the container from where you received the sample.)*
2. Yes
3. No *(go to #29)*
4. Don’t know *(go to #29)*

1. What are the other water sources that you use for drinking? *(Multiple answers possible).*
2. Community tap
3. Tap at the household
4. Unprotected well
5. Protected well
6. Surface water (river, ponds)
7. Rainwater
8. Other: ____________

1. Do you collect water for other purposes such as laundry from other sources?
2. Yes
3. No *(go to #31)*
4. Don’t know *(go to #31)*

1. What are the water sources that you use for purposes other than drinking?
2. Community tap
3. Tap at the household
4. Unprotected well
5. Protected well
6. Surface water (river, ponds)
7. Rainwater
8. Other: ____________

1. What treatments do you know of that can make water safe to drink?
2. Settling
3. Cloth filtration
4. Boiling
5. Chlorine tablets
6. Liquid chlorine
7. Other: ____________

1. Have you washed your hands within the last day (since this time yesterday)?
2. Yes
3. No *(go to #34)*
4. Don’t know *(go to #34)*

1. What were all of the times when you washed your hands within the last day (since this time yesterday)? (*Do not prompt. After each response, ask “any other times?”*)
2. After defecation
3. After cleaning/wiping the child’s bottom
4. After changing the nappy
5. Before preparing food
6. Before eating
7. Before feeding the child
8. After eating
9. Coming back from work/outside the home
10. Other: _______________________________
11. Cannot remember/does not know

1. What did you use to wash your hands?
2. Water only
3. Soap and water
4. Sand
5. Ash and water
6. Other: _____________

1. Have you had diarrhea in the past two weeks? Diarrhea means three or more loose stools per day at any point (*show Bristol stool chart and point to Types 6 and 7*).
2. Yes
3. No
4. Don’t know

1. Has your child had diarrhea in the past two weeks?
2. Yes
3. No
4. Don’t know

1. What type of toilet/latrine or sanitation system do you use most often?
2. Flush/pour flush toilet to piped sewer system
3. Flush/pour flush toilet to underground pit/tank
4. Pit latrine with concrete slab (not pour flush)
5. Pit latrine without slab (not pour flush)
6. Bucket
7. Bag *(end survey)*
8. Open defecation (no facilities) *(end survey)*
9. Other: __________________

1. Is this toilet/latrine shared with other households or is it for your private use only?
2. Shared
3. Private
4. Don’t know

1. Is your child eating Plumpy’nut or other food today?
2. Yes – Plumpy’nut
3. Yes – other food
4. Yes - both
5. No

1. If eating Plumpy’nut, when was the packaging opened?
2. < 1 hour ago
3. 1-3 hours ago
4. 3-6 hours ago
5. More than 6 hours ago

1. If eating Plumpy’nut, can we collect a swab sample (explain procedure and give caregiver an unopened Plumpy’nut after collecting the sample)?
2. Yes
3. No

1. If eating other food, what type of food is your child eating today?
2. Solid food
3. Provide name
4. Liquid food
5. Provide name

1. Is this food raw or cooked?
2. Raw
3. Cooked
4. If cooked, when was it cooked?
5. <2 hours ago
6. 2-6 hours ago
7. More than 6 hours ago
8. If cooked more than 2 hours ago, was it reheated?
9. Yes
10. No

1. If eating other food, can we collect a sample (explain the procedure)?
2. Yes
3. No
